# Supplementary material
Source: PubMed Central journal article supplement (PMC11373426)
Supplement: NIHMS1719740-supplement-1.pdf [file NIHMS1719740-supplement-1.pdf]

**SUPPLEMENTAL INFORMATION**

**SUPPLEMENT 1: Sampling type and schedule**

**Table 1.** Type of sampling (drag, small mammal, bird, hare, coyote) that occurred during each month and year on North Manitou Island (NMI) and South Manitou Island (SMI). The black shading illustrates drag sampling with the distance sampled (m<sup>2</sup>) indicated in the corresponding box; the gray indicates small mammal trapping; the dots indicate bird mist-netting; the vertical lines indicate hare trapping; and the black star indicates coyote trapping. When sampling was performed twice within a given month, “2” is written on that month/year. Note: Every year, the sampling procedure for each type of sampling remained consistent and as described in the Methods section.

|      |       | NMI   |  |  |  |      |  |  |  |      |   |  |  |      |   |  |  |        |  |  |  |           |   |  |  |         |  |  |  |          |  |  |  |      |  |  |  |  |  |  |  |
|------|-------|-------|--|--|--|------|--|--|--|------|---|--|--|------|---|--|--|--------|--|--|--|-----------|---|--|--|---------|--|--|--|----------|--|--|--|------|--|--|--|--|--|--|--|
|      |       | April |  |  |  | May  |  |  |  | June |   |  |  | July |   |  |  | August |  |  |  | September |   |  |  | October |  |  |  | November |  |  |  |      |  |  |  |  |  |  |  |
| 2011 |       |       |  |  |  |      |  |  |  | 3000 |   |  |  |      |   |  |  | 2750   |  |  |  |           |   |  |  |         |  |  |  | 800      |  |  |  | 3000 |  |  |  |  |  |  |  |
| 2012 | 10561 |       |  |  |  | 1450 |  |  |  | 6000 | 2 |  |  | 6000 | 2 |  |  | 3000   |  |  |  | 4820      | 2 |  |  | 1350    |  |  |  |          |  |  |  | 2685 |  |  |  |  |  |  |  |
| 2013 |       |       |  |  |  | 5250 |  |  |  | 2500 |   |  |  |      |   |  |  |        |  |  |  |           |   |  |  |         |  |  |  |          |  |  |  |      |  |  |  |  |  |  |  |
| 2014 |       |       |  |  |  | 3000 |  |  |  | 3000 |   |  |  | 3000 |   |  |  | 3000   |  |  |  | 3080      |   |  |  |         |  |  |  |          |  |  |  | 3000 |  |  |  |  |  |  |  |
| 2015 |       |       |  |  |  |      |  |  |  |      |   |  |  |      |   |  |  |        |  |  |  |           |   |  |  |         |  |  |  |          |  |  |  | 3000 |  |  |  |  |  |  |  |

|      |      | SMI   |  |  |  |      |  |  |  |      |   |  |  |      |   |  |  |        |  |  |  |           |   |  |  |         |  |  |  |          |  |  |  |      |  |  |  |   |  |  |  |
|------|------|-------|--|--|--|------|--|--|--|------|---|--|--|------|---|--|--|--------|--|--|--|-----------|---|--|--|---------|--|--|--|----------|--|--|--|------|--|--|--|---|--|--|--|
|      |      | April |  |  |  | May  |  |  |  | June |   |  |  | July |   |  |  | August |  |  |  | September |   |  |  | October |  |  |  | November |  |  |  |      |  |  |  |   |  |  |  |
| 2011 |      |       |  |  |  |      |  |  |  | 2750 |   |  |  | 4150 |   |  |  |        |  |  |  | 3000      |   |  |  |         |  |  |  |          |  |  |  |      |  |  |  |   |  |  |  |
| 2012 | 3000 |       |  |  |  | 6000 |  |  |  | 6000 | 2 |  |  | 6000 | 2 |  |  | 3000   |  |  |  | 6100      | 2 |  |  | 1350    |  |  |  |          |  |  |  |      |  |  |  |   |  |  |  |
| 2013 |      |       |  |  |  |      |  |  |  | 2500 |   |  |  |      |   |  |  |        |  |  |  |           |   |  |  |         |  |  |  |          |  |  |  |      |  |  |  |   |  |  |  |
| 2014 |      |       |  |  |  | 3000 |  |  |  | 3000 |   |  |  | 3000 |   |  |  | 3000   |  |  |  | 3000      |   |  |  | 3000    |  |  |  | 3000     |  |  |  |      |  |  |  | ★ |  |  |  |
| 2015 |      |       |  |  |  |      |  |  |  |      |   |  |  |      |   |  |  |        |  |  |  |           |   |  |  |         |  |  |  |          |  |  |  | 3000 |  |  |  |   |  |  |  |

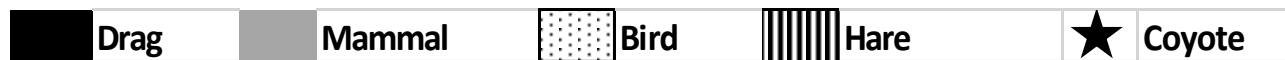

**SUPPLEMENT 2: Additional pathogen detection results**

In 2014, all of the ticks attached to mammals and questing ticks were tested at the CDC (and not at MSU), at which time they not only tested the ticks for *B. burgdorferi*, but also for *Anaplasma phagocytophilum* and *Babesia microti*. On NMI, 20 nymphs (4.3%) and 10 larval batches (8.3%) removed from small mammals were infected with both *Anaplasma phagocytophilum* and *B. burgdorferi*. On SMI, one larval batch (5.3%), which was removed from an eastern chipmunk, was co-infected with *Anaplasma phagocytophilum* and *B. burgdorferi*. One adult blacklegged tick from NMI was co-infected with *Anaplasma phagocytophilum* and *B. burgdorferi*. No ticks were infected with *Babesia microti* from either island.

**SUPPLEMENT 3: Infection prevalence of ticks removed from mammals****Table 2. Infection prevalence of *I. scapularis* larvae (a) and nymphs (b) removed from captured white-footed mice (WFMO) and eastern chipmunks (EACH) on NMI and SMI in June from 2011-2014. The total number of ticks tested is indicated in parentheses.**

| a)          | WFMO       |           | EACH       |           |
|-------------|------------|-----------|------------|-----------|
|             | NMI        | SMI       | NMI        | SMI       |
| <b>2011</b> | 7.1% (14)  | 0.0% (1)  | 18.9% (37) | 0.0% (1)  |
| <b>2012</b> | 18.2% (11) | 0.0% (3)  | 62.5% (8)  | 0.0% (3)  |
| <b>2013</b> | 71.4% (7)  | 20.0% (5) | 72.9% (70) | 0.0% (3)  |
| <b>2014</b> | 71.4% (7)  | N/A (0)   | 52.2% (69) | 66.7% (3) |

| b)          | WFMO       |          | EACH        |            |
|-------------|------------|----------|-------------|------------|
|             | NMI        | SMI      | NMI         | SMI        |
| <b>2011</b> | 23.1% (13) | 0.0% (1) | 20.0% (30)  | N/A (0)    |
| <b>2012</b> | N/A (0)    | 0.0% (1) | 25.0% (4)   | 0.0% (1)   |
| <b>2013</b> | 100% (3)   | 0.0% (1) | 70.4% (162) | 25.0% (4)  |
| <b>2014</b> | 100% (8)   | N/A (0)  | 73.1% (275) | 42.4% (33) |

**SUPPLEMENT 4: Bird species captured on SMI in 2014**

In 2014, the following species of birds were captured on South Manitou Island: American redstart (*Setophaga ruticilla*), American robin (*Turdus migratorius*), American tree sparrow (*Spizella arborea*), black-capped chickadee (*Poecile atricapillus*), brown creeper (*Certhia americana*), cedar waxwing (*Bombycilla cedrorum*), chipping sparrow (*Spizella passerine*), cape may warbler (*Setophaga tigrine*), dark-eyed junco (*Junco hyemalis*), field sparrow (*Spizella pusilla*), golden-crowned kinglet (*Regulus satrapa*), gray catbird (*Dumetella carolinensis*), hermit thrush (*Catharus guttatus*), myrtle warbler (*Setophaga coronate*), Nashville warbler (*Leiothlypis ruficapilla*), northern waterthrush (*Parkesia noveboracensis*), orange-crowned warbler (*Vermivora celata*), ovenbird (*Seiurus aurocapilla*), pine siskin (*Spinus pinus*), purple finch (*Haemorhous purpureus*), ruby-crowned kinglet (*Regulus calendula*), red-eyed vireo (*Vireo olivaceus*), white-crowned sparrow (*Zonotrichia leucophrys*), winter wren (*Troglodytes hiemalis*), western palm warbler (*Setophaga palmarum*), and yellow-rumped warbler (*Setophaga coronate*).
